# Supplementary material
Source: PubMed Central journal article supplement (PMC7848633)
Supplement: pnas.2017218118.sapp.pdf [file pnas.2017218118.sapp.pdf]

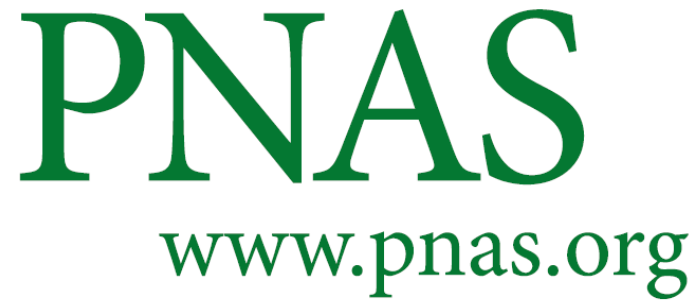

## **Supplementary Information for**

**Discrete TrkB-expressing neurons of the dorsomedial hypothalamus regulate feeding and thermogenesis.**

Jessica Houtz, Guey-Ying Liao, Juan Ji An, Baoji Xu\*

\*Corresponding Author  
Email: [BXu@scripps.edu](mailto:BXu@scripps.edu)

### **This PDF file includes:**

Supplementary Materials and Methods  
Figures S1 to S5  
Table S1

## Supplementary Materials and Methods

### Mice

Mice were maintained on a C57BL6/J background in a climate-controlled facility at 22°C on a 12h/12h light-dark cycle with *ad libitum* access to water and chow diet (Teklad Rodent Diet 2920) unless otherwise specified. The Ai9/+ mouse strain [Gt(ROSA)26Sortm9(CAG-tdTomato)Hze/J; stock no. 007909] was acquired from Jackson Laboratory. The *Ntrk2<sup>CreER/+</sup>* (also known as *TrkB<sup>CreER</sup>*) mouse strain was generously provided by Dr. David Ginty (Harvard Medical School). Male and female mice aged 6-12 weeks old were used for initial investigations of chemogenetic activation or inhibition of global DMH<sup>TrkB</sup> neurons. Both males and females showed similar phenotypes, thus only female mice were used for subsequent projection specific manipulation of DMH<sup>TrkB</sup> neuronal activity. Nuclear localization of Cre recombinase in *Ntrk2<sup>CreER/+</sup>* mice was induced by tamoxifen (20 mg/ml in corn oil, Sigma-Aldrich T-5648) administration for 6 days [3 mg per animal per day, intraperitoneally (i.p.)] except where otherwise indicated. For DREADD experiments, mice were injected i.p. with CNO (1.5 mg/kg, Cayman Chemical 16882). All experiments were performed in accordance with relevant guidelines and regulations regarding the use of experimental animals. The Animal Care and Use Committees at The Scripps Research Institute Florida approved all animal procedures used in this study.

### Immunohistochemistry

For Fos quantification in *Ntrk2<sup>CreER/+</sup>;Ai9/+* animals, labeling of TrkB+ neurons was induced with tamoxifen as described above. One week after the last tamoxifen injection, mice were individually placed in fresh cages in either warm (39°C), cold (10°C), or thermoneutral (30°C) ambient temperatures 2 hours prior to transcardial perfusion with 4% paraformaldehyde (PFA). Brains were dissected, post-fixed in 4%PFA overnight at 4°C, and cryoprotected in 30% sucrose for 3 days prior to collection of 40 µm floating coronal sections. For Fos staining to confirm activation of DMH<sup>TrkB</sup> neurons expressing hM3, or projection-specific activation of DMH<sup>TrkB→RPa</sup> neurons expressing hM3, mice were treated with CNO 2 hours prior to dissection and fixation of the brain. Sections were permeabilized in 1% Triton-X100 (T-X100), incubated in blocking buffer (10% horse serum, 1% bovine serum albumin (BSA), 0.1% T-X100 in PBS) for one hour at room temperature (RT) followed by incubation with primary antibody, rabbit anti-cFos (1:10,000, Synaptic System #226003) in 1% horse serum, 0.1% BSA, 0.1% T-X100 in PBS overnight at 4°C. The next day, sections were washed in PBS before incubation with secondary antibody (1:800, 488-donkey anti-rabbit, Jackson ImmunoResearch, 171-545-152) in blocking buffer for 1 hour at RT. Sections were washed again in PBS before staining for 20 minutes in DAPI (5 µg/mL, Roche 10236276001) in PBS. Sections were then mounted on Superfrost plus microscope slides (Fisher, 12-550-15) and sealed with mounting media (2.5% PVA-DABCO) and glass coverslips.

For analysis of anterograde tracing in BAT and heart tissues, mice were perfused with PBS followed by 4% PFA, and brown adipose tissue and heart were dissected and fixed overnight in 4% PFA. Tissues were cryoprotected in 30% sucrose, embedded in OCT, and frozen before collecting 20 µm sections with a cryostat. Sections were permeabilized in 1% T-X100 for 9 minutes, blocked in 5% horse serum/1% bovine serum albumin (BSA)/0.1% T-X100 for 1 hour, and incubated with primary antibodies (rabbit anti-UCP1, 1:750, Abcam ab10983; mouse anti-tyrosine hydroxylase, 1:1,500, Sigma-Aldrich T1299) in blocking buffer overnight at 4°C. Sections were washed in PBS and incubated with secondary antibodies (1:800, Jackson ImmunoResearch) in blocking buffer for 1 hour at RT. Sections were washed with PBS and stained with DAPI and sealed with mounting media (2.5% PVA-DABCO) and glass coverslips.

Images representing 1-µm optical slices were taken using a Nikon C2+ confocal microscope equipped with 405, 488, 561, and 640nm coherent lasers. For Fos quantification of DMH<sup>TrkB</sup> neurons, every third brain section was imaged bilaterally for a total of 7 sections spanning 520 µm of the DMH. Cell counts were performed using ImageJ Cell counter (NIH). Averages of TrkB+ and TrkB+/Fos+ neurons were taken for the first two sections representing the anterior DMH, the 3<sup>rd</sup>-5<sup>th</sup> sections representing the middle DMH, and the last two sections representing the posterior DMH.

### Stereotaxic surgery

*Ntrk2<sup>CreER/+</sup>* mice at 6-8 weeks of age were anesthetized with isoflurane and mounted on a stereotaxic frame (Kopf Model 960). An incision through the skin along the midline of the head was made to expose the skull and the location of Bregma was determined as the reference point for the injection site coordinates [anterior-posterior (AP)/mediolateral (ML)/ dorsoventral (DV)]: POA (AP, +0.60 mm/ ML, ±0.35 mm/ DV, -5.70 mm), PVH (AP, -0.50 mm/ ML, ±0.35 mm/ DV, -5.30 mm), DMH (AP, -1.50 mm/ ML, ±0.35 mm, DV, -5.70 mm), RPa (AP, -6.00 mm/ ML, 0.00 mm/ DV, -6.35 mm). A small hole was drilled through the skull at the injection site, the dura was gently peeled away, and a 2.5-µl syringe (Hamilton 7632-01) with 33G needle was slowly lowered into the brain. Virus was infused at a rate of 25 nl/min with a micropump and controller (World Precision Instruments, UMP3 pump and Micro4 controller) for a total of 250 nl (DMH) or 150 nl (POA, PVH, and RPa). Mice were allowed to recover for 1 week before induction

with tamoxifen as described above, and experiments were conducted 1 week following the last tamoxifen injection. CTB-488 and CTB-647 (Invitrogen) were stereotaxically injected into a brain site at 1 mg/ml.

For polysynaptic anterograde tracing with HSV129 $\Delta$ TK-tt, *Ntrk2*<sup>CreER/+</sup> mice were given daily injections of tamoxifen (3mg/animal) starting 2 days prior to stereotaxic viral injection of HSV129 $\Delta$ TK-TT (150nl, 2.2x10<sup>10</sup> pfu/mL) unilaterally into the DMH, and continuing on postoperative days 1-4.

### **Core body temperature measurements**

Animals were allowed to acclimate for 6 days to thermoneutral (30°C) or cold (10°C) housing for excitatory hM3 or inhibitory hM4 DREADD experiments, respectively. During this time animals were also conditioned to mock i.p. injections, and temperature measurements with a digital thermometer (Fisher Traceable Type-K thermometer) with rodent rectal temperature probe (World Precision Instruments, RET-3). For experiments performed in a cold environment, animals were housed individually. On the day of the experiment, rectal temperature was recorded immediately prior to i.p. injection of vehicle. Rectal temperature was recorded every 20 minutes for 1 hour. After the collection of the last timepoint following vehicle injection, another baseline measurement was recorded immediately prior to injection with CNO, and rectal temperature was acquired every 20 minutes for 1 hour for mice housed at thermoneutrality and for 1.5 hours for mice housed at 10°C. This procedure was repeated for two additional days and the average of the measurements for three days was determined for each animal.

### **iBAT temperature measurements**

Animals were allowed to acclimate to thermoneutral housing and handling 6 days prior to experimentation. The day before testing, mice were anesthetized and the hair on their backs and above their shoulders was shaved. On the day of experimentation, a thermal camera (FLIR E53sc) was mounted above a cage with mice expressing either control (mCherry) or excitatory (hM3) virus in DMH<sup>TrkB</sup> neurons. Thermal images were collected 1 hour after i.p. injection of vehicle or CNO and regions above the shoulders (above interscapular BAT), lumbar area (body), and tail were analyzed using Research IR software (FLIR). The average of 3 days of testing was determined for each animal.

### **Physiological measurements**

Locomotor activity and oxygen consumption in individual mice were measured using a comprehensive lab animal monitoring system (CLAMS, Columbus Instruments). Mice were previously conditioned for at least 1 week to thermoneutrality (for excitatory DREADD experiments) and 10°C (for inhibitory DREADD experiments) and allowed to acclimate to metabolic chambers for at least 24 hours prior to experimentation. Mice received a vehicle i.p. injection in the morning (between 8-9 am) and a second i.p injection with CNO (between 12-1 pm). Physical activity and metabolic data were collected for 4 hours following treatment with either vehicle or CNO. This paradigm was repeated for a second day and the data for each animal was averaged for days 1 and 2.

Heart rate and blood pressure were recorded using a tail cuff system (MC4000, Hatteras Instruments). Animals were acclimated to handling and restraint in the tail cuffs for 5 days prior to experimentation. The platform was set to 35°C, with 10 preliminary measurement cycles were followed by 15 cycles of measurement. Animals were placed in the tail cuffs 30 minutes after i.p injection with vehicle or CNO. Vehicle and CNO measurements were collected on different days at the same time of day to minimize the effect of stress due to restraint in the tail cuffs.

Nocturnal food intake studies were performed as previously described (1). Mice were acclimated to handling and single housing for 3 days prior to experimentation. Food intake was monitored for 4 nights following treatment with either vehicle (nights 1 and 2) or CNO (nights 3 and 4). On the day of the experiment, food was removed from the cage 3 hours prior to lights-off, and animals were given an i.p. injection of vehicle or CNO 10 minutes before lights-off. At the onset of lights-off, two food pellets (Teklad Rodent Diet 2920X; 3.1 kcal/g energy density) were weighed (with 0.01g precision) and placed in the cage with the mouse. Food was weighed again every hour for 4 hours after lights-off. Food intake for the two nights following either vehicle or CNO injection were averaged for each animal.

### **Quantitative RT-PCR**

For measurement of *Ucp1* levels in BAT following activation of DMH<sup>TrkB</sup> neurons, BAT tissue was dissected 2 hours after injection of CNO and snap-frozen in liquid nitrogen. RNA was extracted from 15-20 mg of BAT with TRIzol (Invitrogen) and chloroform, and precipitated with isopropanol. RNA was reverse-transcribed with M-MuLV reverse transcriptase (New England Biolabs, M0253) and random hexamers (ThermoFisher N8080127), and cDNA was diluted (1:5) prior to quantitative PCR (qPCR) analysis. qPCR was carried out using SYBR green mix (Roche) in an StepOne cycler (Applied Biosystems), using the primers: UCP1-F, 5'-GATGGTGAACCCGACAACCTT-3'; UCP1-R, 5'-CTGAACTCCGGCTGAGAAG-3'; 18S rRNA-F, 5'-CGCCGCTAGAGGTGAAATTC-3'; 18S rRNA-R,

5'-TTGGCAAATGCTTTCGCTC-3'. Fold change in UCP-1 transcript levels was calculated using the  $-2\Delta\Delta C_t$  method, normalizing to 18S rRNA transcript.

### Immunoblotting

Two hours following stimulation with CNO (1.5 mg/kg), BAT was dissected from the interscapular region of mice expressing mCherry or hM3 in DMH<sup>TrkB</sup> neurons, snap frozen in liquid nitrogen, and stored at -80°C until further processing. Samples of BAT (10-20 mg) were homogenized in RIPA buffer (50 mM Tris-HCl, 150 mM NaCl, 1 mM EDTA, 1% NP-40, 0.25% deoxycholate, 1 mM NaF) supplemented with PhosStop (Millipore #4906845001) and protease inhibitor cocktail (Roche, 11-836-170-001). Samples were then prepared in 1x Laemmli buffer and 10 µg protein was resolved by SDS-PAGE. Following transfer, PVDF membranes were blocked with 5% milk and incubated with primary antibodies (Cell Signaling Technology #4139, rabbit anti-phospho-HSL(Ser563), 1:1000, and Sigma-Aldrich #A5441, mouse anti-β-actin, 1:5000) overnight at 4°C, followed by washing and incubation with species-appropriate HRP-conjugated secondary antibodies (ThermoFisher Scientific #A16110, goat anti-rabbit-HRP, 1:5000, and #31430, goat anti-mouse-HRP, 1:5000). Immunoblots were then stripped and re-probed for total HSL levels (Cell Signaling Technology #4107, rabbit anti-HSL, 1:1000). All immunoblots were visualized with ECL Supersignal West Pico PLUS Detection Reagent (Thermo Scientific, 34580) and densitometric analysis of bands was performed using ImageJ software.

### Glycerol measurement

Glycerol content of BAT from mice expressing either mCherry or hM3 in DMH<sup>TrkB</sup> neurons and treated with CNO (1.5 mg/Kg) was determined using a Glycerol-Glo Assay (Promega, J3150) according to the manufacturer's instructions. Briefly, BAT tissue was dissected from the interscapular region of mice expressing mCherry or hM3 in DMH<sup>TrkB</sup> neurons 2 hours following treatment with CNO, snap frozen in liquid nitrogen and stored at -80°C until further processing. 5-10 mg of tissue was homogenized in Glycerol Lysis buffer and incubated at 37°C for 30 minutes. Samples were further diluted in Glycerol Lysis Buffer and incubated with Glycerol Detection Reagent for 1 hour at room temperature before detection of luminescence using a plate reader (BMG Labtech, FLUOstar Omega).

### In situ hybridization

Brains from DMH<sup>TrkB→RPa</sup>:mCherry and DMH<sup>TrkB→PVH</sup>:mCherry mice were dissected and immediately frozen on dry ice and stored at -80°C. Prior to sectioning, samples were embedded in OCT (Tissue Tek). Fresh frozen sections (14 µm) were collected with a cryostat (Leica) onto Superfrost Plus slides (Fisherbrand, 12-550-15). Fluorescent *in situ* hybridization was carried out according to the manufacturer's instructions (ACD, RNA Scope Multiplex Fluorescent Detection Kit v2, 323110). Briefly, sections were postfixed for 15 minutes in 4% paraformaldehyde and dehydrated with ethanol (50%, 75%, 100%). Sections representing at least one anterior DMH position (~B = -1.6 mm) and one middle DMH position (~B = -1.9 mm) were outlined with a hydrophobic barrier and allowed to dry for 20 minutes. Sections were placed in a humidified chamber and treated with H<sub>2</sub>O<sub>2</sub> for 10 minutes at room temperature, digested with Protease IV for 20 minutes at room temperature, and then hybridized with target probes (mCherry #431201-C4, mm-Brs3 #454111-C2, mm-Slc17a6 #319171-C3, and mm-Slc32a1 #319191-C2). Signal amplification was carried out by incubation with v2-Amp1, v2-Amp2, and v2-Amp3, followed by TSA Plus Fluorescein/Rhodamine/Cyanine 5 (NEL754001KT, Akoya). Sections were counterstained with DAPI and 4-5 µm confocal z-stacks were acquired (Nikon C2+).

### SI References

1. G. Y. Liao, C. E. Kinney, J. J. An, B. Xu, TrkB-expressing neurons in the dorsomedial hypothalamus are necessary and sufficient to suppress homeostatic feeding. *Proceedings of the National Academy of Sciences of the United States of America* **116**, 3256-3261 (2019).

## Supplementary Figures

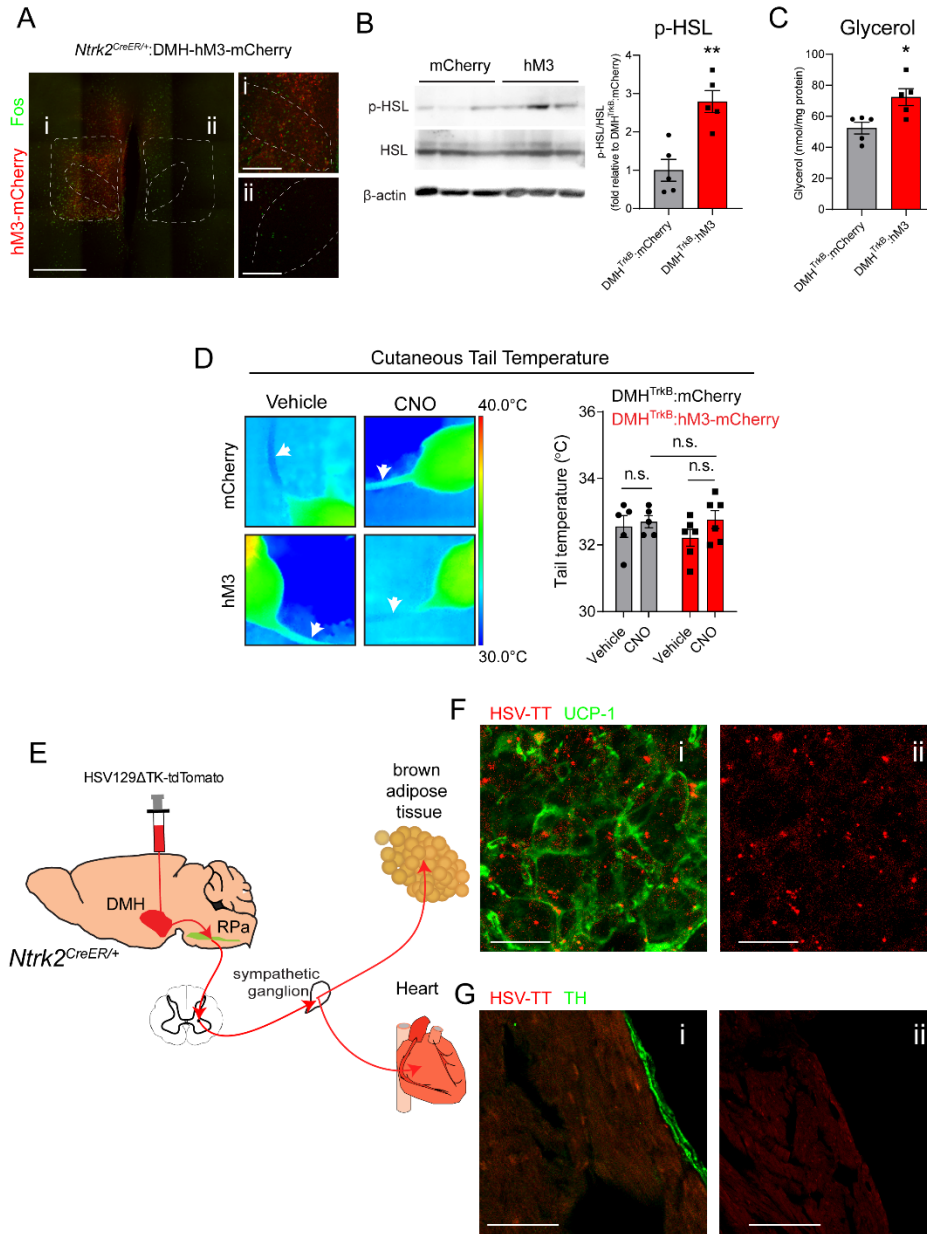

**Figure S1. DMH<sup>TrkB</sup> neurons do not influence vasoconstriction and form polysynaptic connections with BAT but not heart.** (A) Expression of Fos (green) after unilateral stimulation of DMH<sup>TrkB</sup> neurons expressing hM3-mCherry (Ai, red) with CNO, and (Aii) the non-injected contralateral side. Scale bars = 500  $\mu$ m (A), 200 $\mu$ m (Ai, ii). Representative images are from  $n = 3$  animals. (B, C) Level of phosphorylated hormone sensitive lipase (p-HSL) and glycerol in brown adipose tissue from DMH<sup>TrkB</sup>:mCherry ( $n = 5$ ) or DMH<sup>TrkB</sup>:hM3 ( $n = 5$ ) mice following treatment with CNO. \* $p < 0.05$  and \*\* $p < 0.01$  by T test. (D) Activation of DMH<sup>TrkB</sup> neurons did not alter cutaneous tail temperature (indicator of vasoconstriction or vasodilation) as measured by thermal imaging ( $n = 5$  mCherry, 6 hM3). Two-way RM ANOVA: mCherry vs. hM3,  $F_{(1, 18)} = 0.2741$ ,  $p = 0.6070$ . (E) Diagram of polysynaptic anterograde tracing of DMH<sup>TrkB</sup> neurons in *Ntrk2<sup>CreER/+</sup>* mice. Following induction with tamoxifen, stereotactic delivery of Cre-dependent HSV129 $\Delta$ TK virus expressing tdTomato into the DMH of *Ntrk2<sup>CreER/+</sup>* mice allows for labeling of multiple orders of DMH<sup>TrkB</sup> neuron targets 4-5 days post-injection. (F) Analysis of interscapular brown adipose tissue, (Fi) labeled by UCP-1, showed significant (Fii) deposits of tdTomato indicating robust anterograde labeling from DMH<sup>TrkB</sup> neurons that drive thermogenesis. (G) Analysis of the heart revealed (Gi) labeling of sympathetic fibers by tyrosine hydroxylase (TH), but no detectable (Gii) tdTomato labeling (HSV-TT) from DMH<sup>TrkB</sup> neurons. Values represent mean  $\pm$  s.e.m., Sidak post-test (n.s. = not significant). (F, G) Representative images are from  $n = 4$  animals. Scale bars = 20  $\mu$ m (Fi-ii), 50  $\mu$ m (Gi-ii).

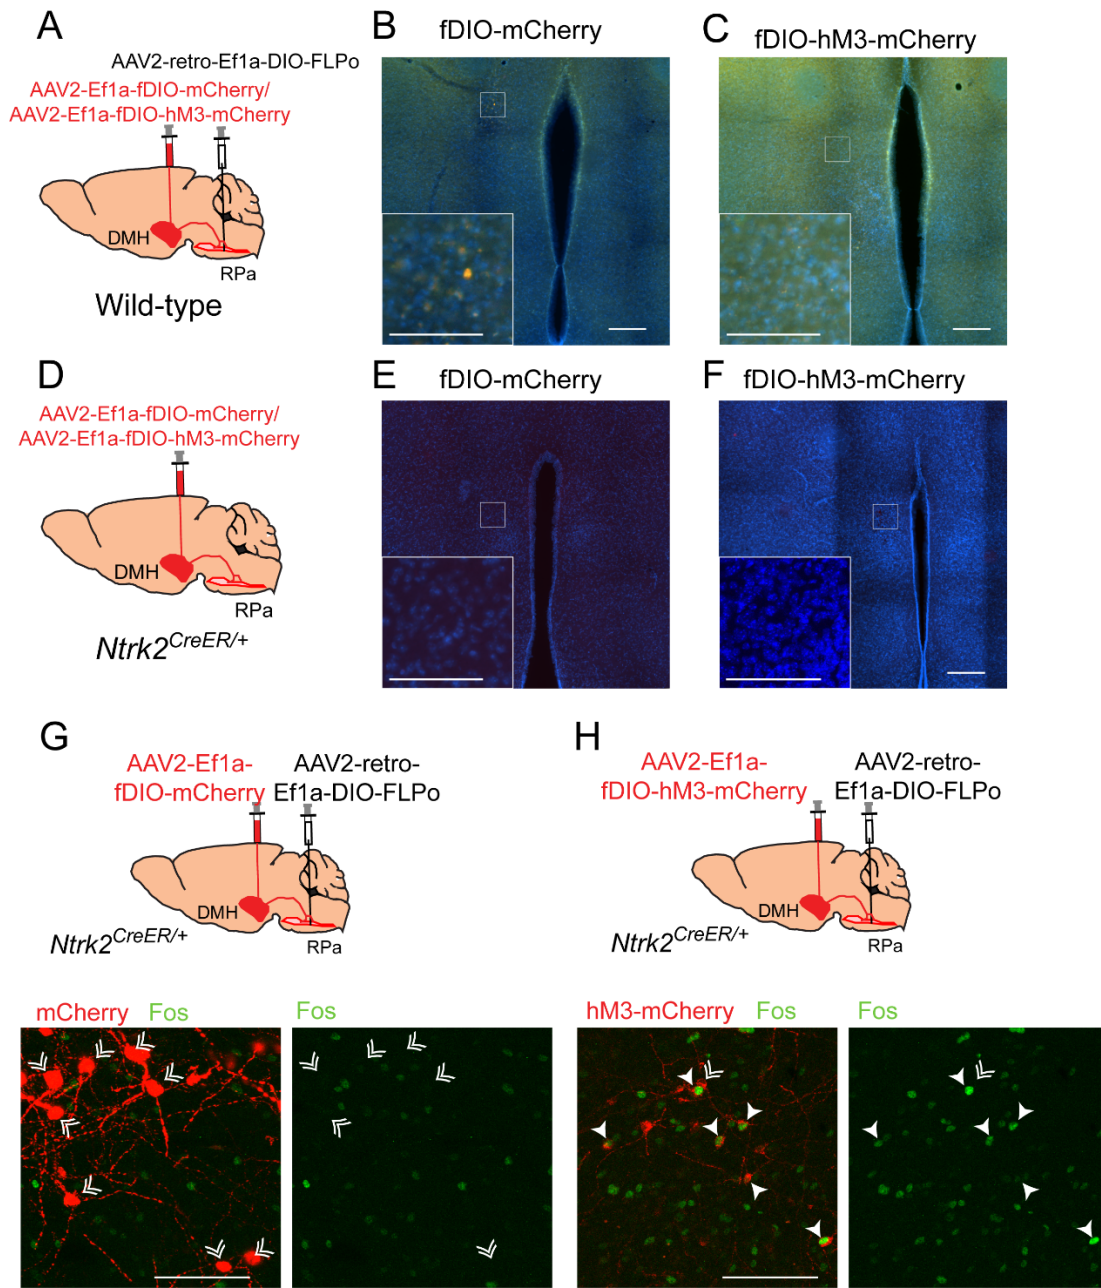

**Figure S2. Validation of viral strategy for projection-specific expression and chemogenetic excitation of DMH<sup>TrkB</sup> neurons.** (A) Schematic of stereotactic delivery of retrograde AAV expressing Cre-dependent FLPo (AAV2-retro-Ef1a-DIO-FLPo) and AAV2-CMV-GFP to the RPa, and FLP-dependent (fDIO) mCherry or hM3-mCherry expressing virus to the DMH in wild-type mice. (B, C) No expression of mCherry or hM3-mCherry was detectable within the DMH of wild-type mice. (D-F) Injection of *Ntrk2*<sup>CreER/+</sup> with AAV expressing FLP-dependent (E) mCherry or (F) hM3-mCherry does not result in expression without the additional injection of retrograde AAV expressing Cre-dependent FLP into a DMH<sup>TrkB</sup> projection target. Scale bars = 200 μm, inset scale bars = 100 μm. (G, H) Expression of Fos after treatment with CNO in mice expressing (G) mCherry or (H) hM3-mCherry in DMH<sup>TrkB</sup> neurons. Double arrowheads indicate Fos<sup>-</sup> DMH<sup>TrkB</sup> neurons. Solid arrowheads indicate Fos<sup>+</sup> DMH<sup>TrkB</sup> neurons. Scale bars = 100 μm.



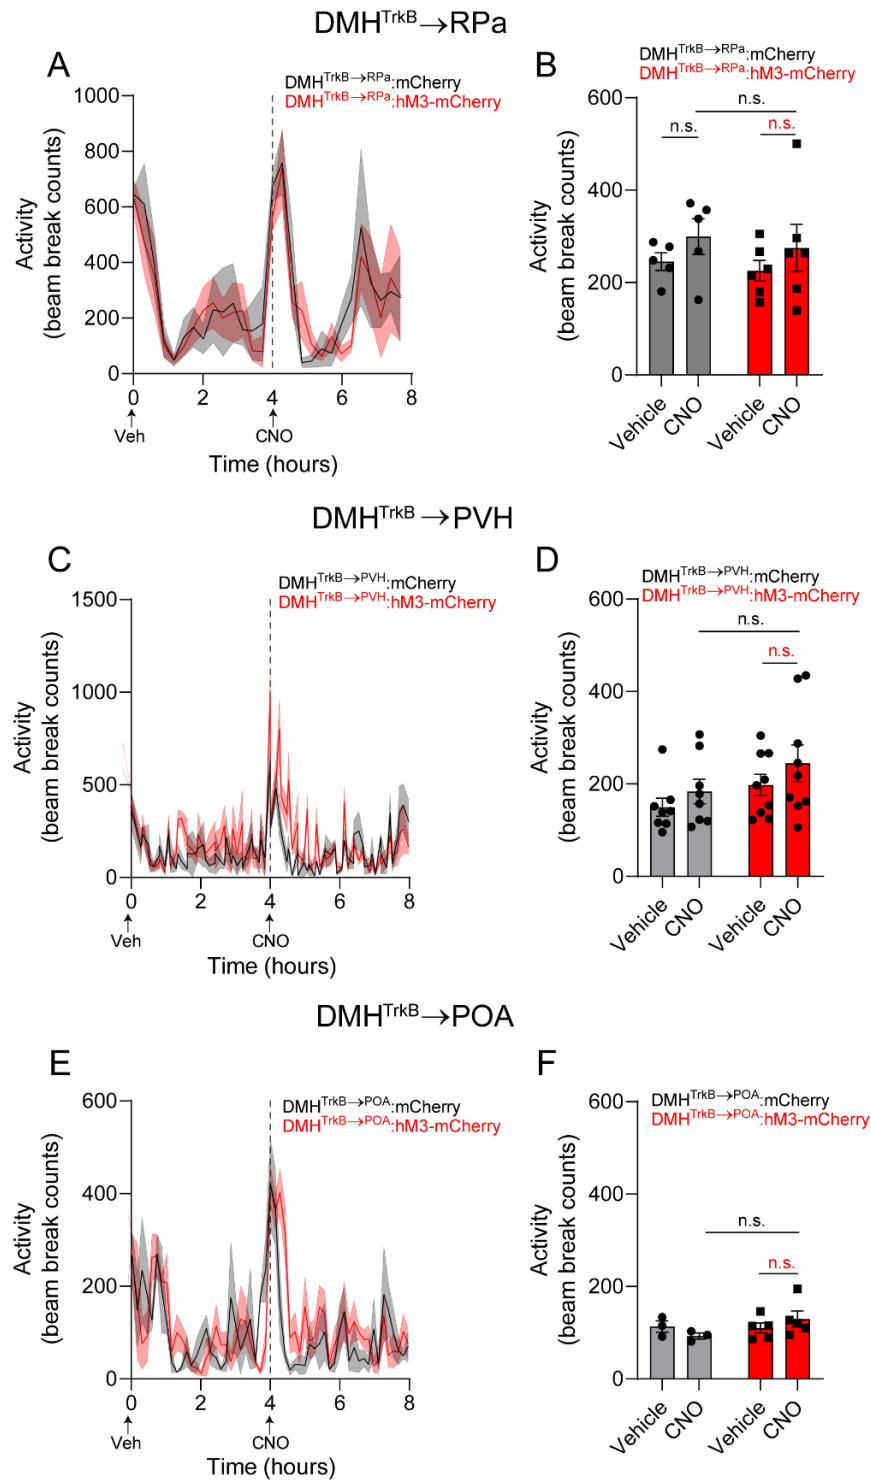

**Figure S3. PVH-, POA-, and RPa-projecting DMH<sup>TrkB</sup> neurons do not regulate locomotor activity.** Mice housed at thermoneutrality were treated with vehicle (Veh) and then CNO during the light cycle. Activation of (**A**, **B**) DMH<sup>TrkB</sup> → RPa neurons ( $n = 5$  mCherry mice, 6 hM3 mice), (**C**, **D**) DMH<sup>TrkB</sup> → PVH neurons ( $n = 8$  mCherry, 9 hM3), or (**E**, **F**) DMH<sup>TrkB</sup> → POA neurons ( $n = 3$  mCherry, 5 hM3) did not alter physical activity. (**A**, **C**, **E**) Locomotor activity after vehicle administration (hour 0-4) followed by CNO (hour 4-8). Two-way RM ANOVA: mCherry vs. hM3 (post-CNO), (**A**)  $F_{(1, 9)} = 0.06638$ ,  $p = 0.8025$ ; (**C**) Mixed effects model: mCherry vs hM3,  $F_{(1, 15)} = 1.478$ ,  $p = 0.2429$ ; (**E**) Two-way RM ANOVA:  $F_{(1, 6)} = 2.533$ ,  $p = 0.1626$ . (**B**, **D**, **F**) Average locomotor activity for the duration of 4 hours following either vehicle or CNO treatment. Two way RM ANOVA: mCherry vs. hM3, (**B**)  $F_{(1, 9)} = 0.4086$ ,  $p = 0.5386$ , (**D**)  $F_{(1, 15)} = 2.111$ ,  $p = 0.1669$ , (**F**)  $F_{(1, 6)} = 3.189$ ,  $p = 0.1244$ . Values represent mean  $\pm$  s.e.m., with Sidak post-test (n.s. = not significant).

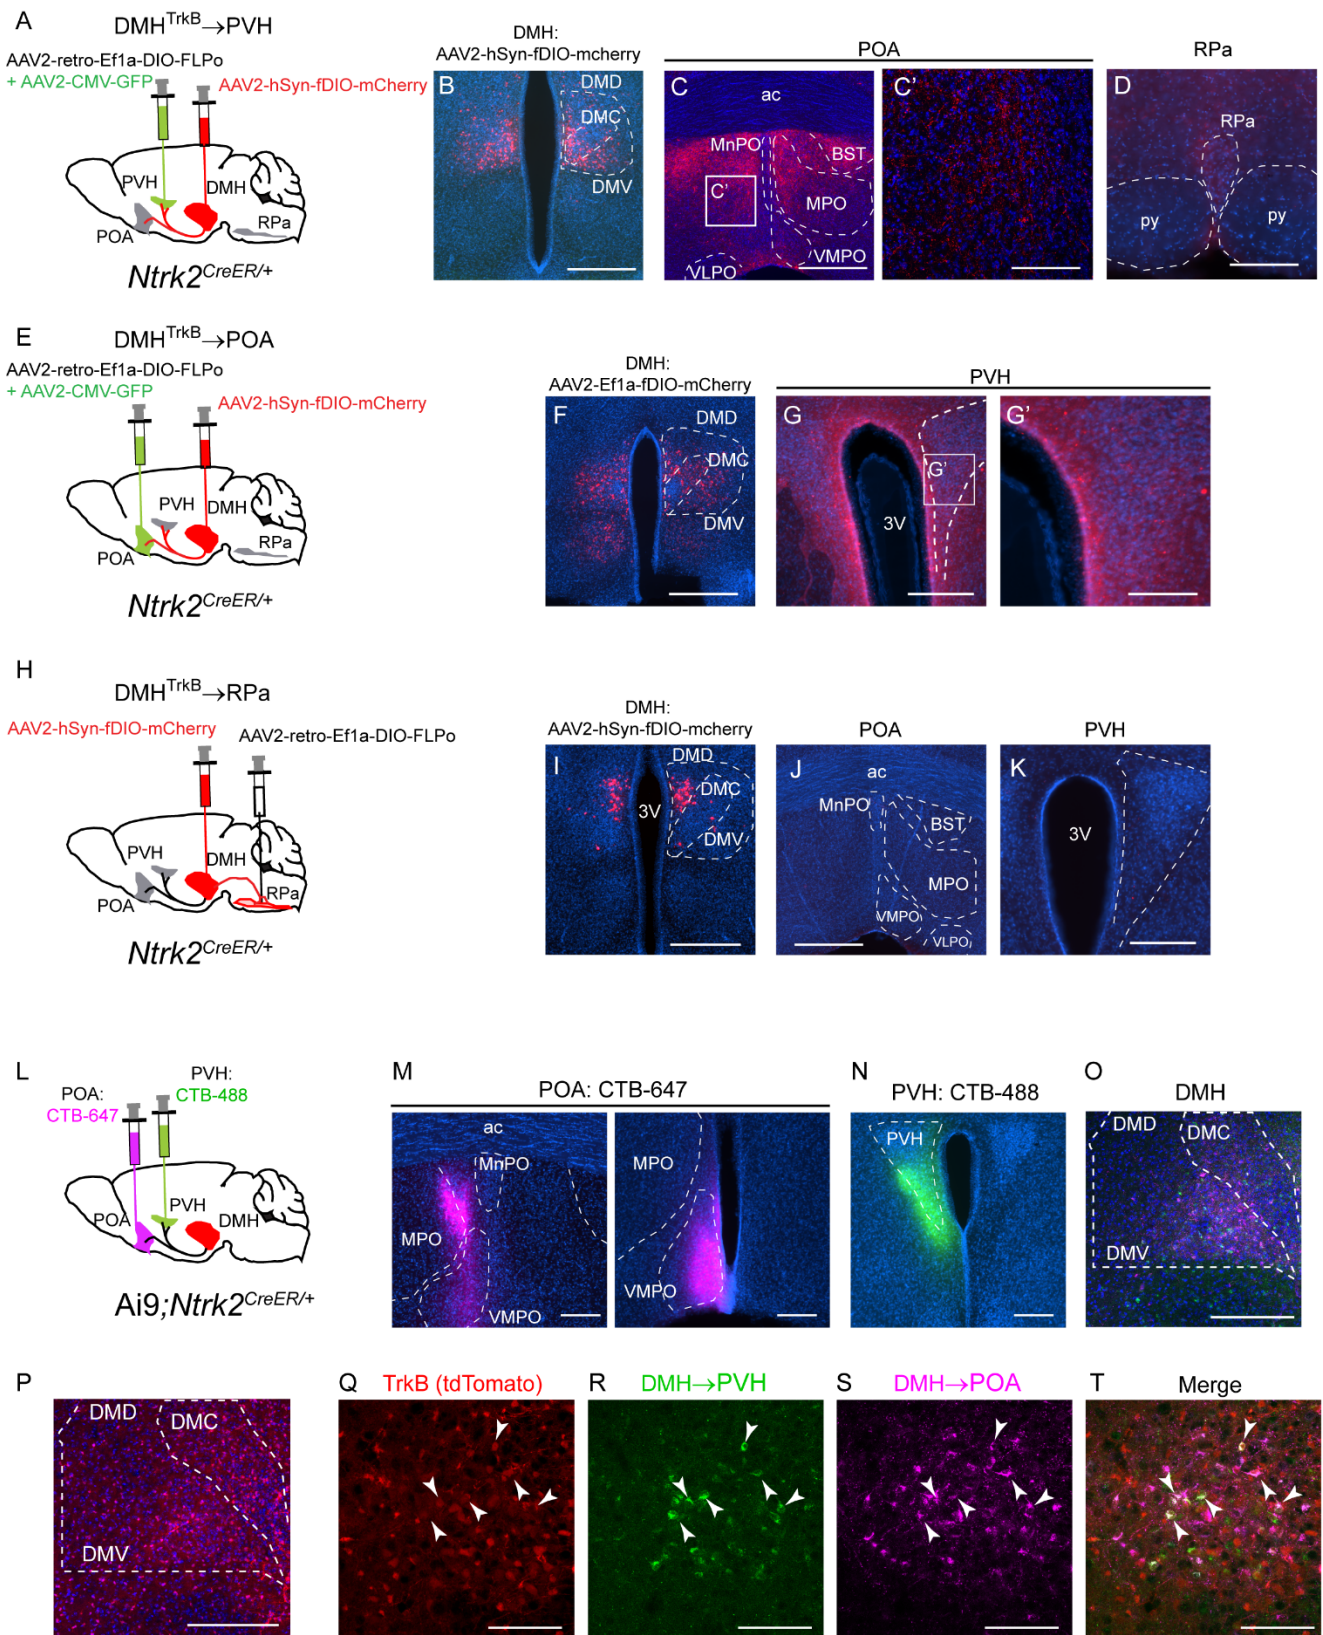

**Figure S4.  $DMH^{TrkB} \rightarrow PVH$  neurons send collaterals to the POA.** (A-D) Selective viral expression of mCherry in PVH-projecting  $DMH^{TrkB}$  neurons reveals collaterals of these neurons in the POA, but not in the RPa. (E-G) Selective viral expression of mCherry in POA-projecting  $DMH^{TrkB}$  neurons reveals collaterals of these neurons in the PVH. (H-K) Selective viral expression of mCherry in  $DMH^{TrkB} \rightarrow RPa$  neurons shows that these neurons do not innervate the POA or the PVH. (L) Diagram of simultaneous retrograde tracing from both the POA and the PVH in  $Ai9;Ntrk2^{CreER/+}$



reporter mice. **(M)** Injection of cholera toxin subunit B Alexa Fluor 647 conjugate (CTB-647) into the POA. **(N)** Injection of CTB-488 into the PVH. **(O)** Retrograde labeling of neurons in the DMH that project to the POA (magenta) or the PVH (green). **(P)** Cre-dependent labeling of TrkB-expressing neurons in the DMH with tdTomato (red). **(Q-T)** Some neurons in the DMH express TrkB (red) are labeled by both CTB-488 injected into the PVH (green) and CTB-647 injected into the POA (magenta), as indicated by arrowheads. Scale bars = 500  $\mu\text{m}$  in **(B, C, F, I, J)**, 200  $\mu\text{m}$  in **(D, G, K, M-P)**, and 100  $\mu\text{m}$  in **(C', G', Q-T)**. Abbreviations: ac, anterior commissure; BST, bed nucleus stria terminalis; DMD, dorsal part of dorsomedial hypothalamus; DMC, central part of dorsomedial hypothalamus; DMV, ventral part of dorsomedial hypothalamus; MPO, medial preoptic area; MnPO, median preoptic area; PVH, paraventricular hypothalamus; VLPO, ventrolateral preoptic area; VMPO, ventromedial preoptic area; 3V, third ventricle.

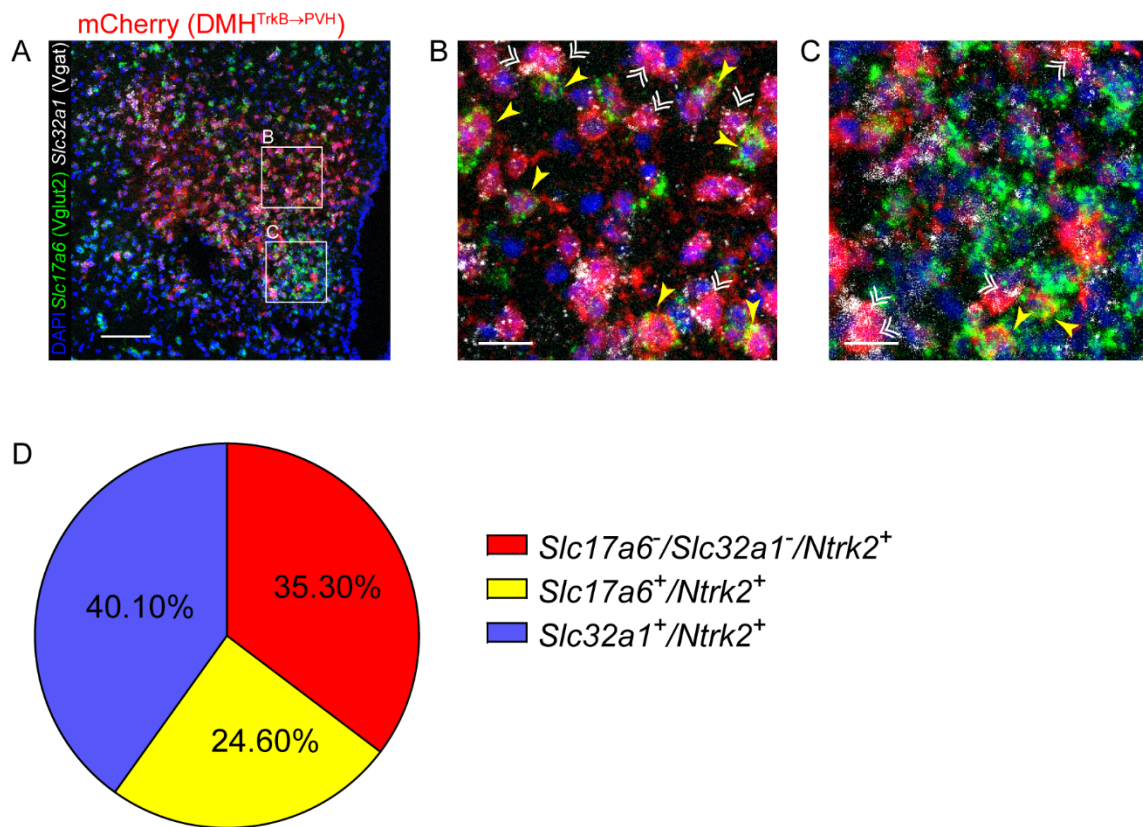

**Figure S5. DMH<sup>TrkB→PVH</sup> neurons are heterogeneous and comprised of both inhibitory and excitatory neuron populations.** (A) *In situ* detection of *Slc17a6* (Vglut2, green) and *Slc32a1* (Vgat, white) in the middle-dorsal (B) and middle-ventral (C) DMH of DMH<sup>TrkB→PVH</sup>:mCherry mice. Yellow arrowheads indicate Vglut<sup>+</sup> DMH<sup>TrkB→PVH</sup> neurons. Double white arrowheads indicate Vgat<sup>+</sup> DMH<sup>TrkB→PVH</sup> neurons. (D) Quantification of percent DMH<sup>TrkB→PVH</sup> neurons that express *Slc17a6* (Vglut2) or *Slc32a1* (Vgat). Scale bars = 100 μm (A) and 20 μm (B, C). Representative images are from *n* = 2 animals.

## Supplementary Table

| Supplementary Table 1: Summary of Statistical Analyses |                         |                                                                                                                                         |                                                                                                                                                                                         |
|--------------------------------------------------------|-------------------------|-----------------------------------------------------------------------------------------------------------------------------------------|-----------------------------------------------------------------------------------------------------------------------------------------------------------------------------------------|
| Figure                                                 | Sample size             | Statistical test                                                                                                                        | P value                                                                                                                                                                                 |
| 1D                                                     | 4 mice<br>per condition | two-way ANOVA<br>Factor 1: anterior-posterior position<br>Factor 2: temperature<br>Dunnett's multiple comparison test                   | position: F (1.880, 16.92) = 7.181, P = 0.2225<br>temperature F (2, 9) = 18.68, P = 0.0062<br>interaction F (4, 18) = 1.580, P = 0.0006<br>subject F (9, 18) = 5.079, P = 0.0017        |
| 2B                                                     |                         | RM two-way ANOVA<br>Factor 1: time (post CNO)<br>Factor 2: viral expression (mcherry, hM3)<br>Sidak's multiple comparison test          | time: F (1.402, 22.43) = 7.879, P = 0.0056<br>viral expression: F (1, 16) = 10.11, P = 0.0058<br>interaction: F (3, 48) = 34.69, P < 0.0001<br>subject: F (16, 48) = 20.38, P < 0.0001  |
| 2C                                                     |                         | RM two-way ANOVA<br>Factor 1: treatment (vehicle, CNO)<br>Factor 2: viral expression (mcherry, hM3)<br>Sidak's multiple comparison test | treatment: F (1, 16) = 133.3, P < 0.0001<br>viral expression: F (1, 16) = 36.55, P < 0.0001<br>interaction: F (1, 16) = 151.7, P < 0.0001<br>subject: F (16, 16) = 10.96, P < 0.0001    |
| 2E                                                     | 5 mCherry<br>7 hM3      | RM two-way ANOVA<br>Factor 1: treatment (vehicle, CNO)<br>Factor 2: viral expression (mcherry, hM3)<br>Sidak's multiple comparison test | treatment: F (1, 10) = 4.824, P = 0.0528<br>viral expression: F (1, 10) = 6.35, P = 0.0304<br>interaction: F (1, 10) = 5.893, P = 0.0356<br>subject: F (11, 11) = 73.71, P < 0.0001     |
| 2F                                                     | 9 mCherry<br>13 hM3     | unpaired t test (two-tailed)                                                                                                            | P = 0.0207                                                                                                                                                                              |
| 2G                                                     | 9 mCherry<br>9 hM3      | Mixed-effects model (REML)<br>Factor 1: time (post CNO)<br>Factor 2: viral expression (mcherry, hM3)                                    | time: F (48, 327) = 3.818, P < 0.0001<br>viral expression: F (1, 16) = 26.89, P < 0.0001<br>interaction: F (48, 327) = 4.433, P < 0.0001                                                |
| 2H                                                     | 9 mCherry<br>9 hM3      | RM two-way ANOVA<br>Factor 1: treatment (vehicle, CNO)<br>Factor 2: viral expression (mcherry, hM3)<br>Sidak's multiple comparison test | treatment: F (1, 16) = 85.88, P < 0.0001<br>viral expression: F (1, 16) = 17.64, P = 0.0007<br>interaction: F (1, 16) = 56.72, P < 0.0001<br>subject: F (16, 16) = 3.262, P < 0.0117    |
| 2I                                                     | 9 mCherry<br>9 hM3      | Mixed-effects model (REML)<br>Factor 1: time (post CNO)<br>Factor 2: viral expression (mcherry, hM3)                                    | time: F (41, 278) = 1.467, P = 0.0398<br>viral expression: F (1, 16) = 16.65, P = 0.0009<br>interaction: F (41, 278) = 2.484, P < 0.0001                                                |
| 2J                                                     | 9 mCherry<br>9 hM3      | RM two-way ANOVA<br>Factor 1: treatment (vehicle, CNO)<br>Factor 2: viral expression (mcherry, hM3)<br>Sidak's multiple comparison test | treatment: F (1, 16) = 0.002426, P = 0.0003<br>viral expression: F (1, 16) = 5.072, P = 0.0387<br>interaction: F (1, 16) = 20.88, P < 0.0001<br>subject: F (16, 16) = 2.187, P = 0.0640 |
| 2K                                                     | 9 mCherry<br>9 hM3      | Mixed-effects model (REML)<br>Factor 1: time (post CNO)<br>Factor 2: viral expression (mcherry, hM3)                                    | time: F (41, 278) = 4.667, P < 0.0001<br>viral expression: F (1, 16) = 39.78, P < 0.0001<br>interaction: F (41, 278) = 4.134, P < 0.0001                                                |
| 2L                                                     | 9 mCherry<br>9 hM3      | RM two-way ANOVA<br>Factor 1: treatment (vehicle, CNO)<br>Factor 2: viral expression (mcherry, hM3)<br>Sidak's multiple comparison test | treatment: F (1, 16) = 57.24, P < 0.0001<br>viral expression: F (1, 16) = 30.86, P < 0.0001<br>interaction: F (1, 16) = 55.79, P < 0.0001<br>subject: F (16, 16) = 1.765, P = 0.1332    |
| 2M                                                     | 8 mCherry<br>12 hM3     | RM two-way ANOVA<br>Factor 1: treatment (vehicle, CNO)<br>Factor 2: viral expression (mcherry, hM3)                                     | treatment: F (1, 18) = 0.04648, P = 0.8317<br>viral expression: F (1, 18) = 0.6447, P = 0.4325<br>interaction: F (1, 18) = 6.618, P = 0.0192                                            |

|    |                     |                                                                                                                                         |                                                                                                                                                                                         |
|----|---------------------|-----------------------------------------------------------------------------------------------------------------------------------------|-----------------------------------------------------------------------------------------------------------------------------------------------------------------------------------------|
|    |                     | Sidak's multiple comparison test                                                                                                        | subject: F (18, 18) = 2.407, P = 0.0352                                                                                                                                                 |
| 2N | 8 mCherry<br>12 hM3 | RM two-way ANOVA<br>Factor 1: treatment (vehicle, CNO)<br>Factor 2: viral expression (mcherry, hM3)<br>Sidak's multiple comparison test | treatment: F (1, 18) = 0.4427, P = 0.5143<br>viral expression: F (1, 18) = 0.01210, P = 0.9136<br>interaction: F (1, 18) = 1.586, P = 0.2240<br>subject: F (18, 18) = 7.885, P < 0.0001 |
| 3B | 6 mCherry<br>7 hM4  | RM two-way ANOVA<br>Factor 1: time (post CNO)<br>Factor 2: viral expression (mcherry, hM4)<br>Sidak's multiple comparison test          | time: F (2.993, 32.92) = 78.61, P < 0.0001<br>viral expression: F (1, 11) = 20.40, P = 0.0009<br>interaction: F (4, 44) = 8.696, P < 0.0001<br>subject: F (11, 44) = 7.509, P < 0.0001  |
| 3C | 6 mCherry<br>7 hM4  | RM two-way ANOVA<br>Factor 1: treatment (vehicle, CNO)<br>Factor 2: viral expression (mcherry, hM4)<br>Sidak's multiple comparison test | treatment: F (1, 11) = 35.51, P < 0.0001<br>viral expression: F (1, 11) = 7.577, P = 0.0188<br>interaction: F (1, 11) = 10.49, P = 0.0079<br>subject: F (11, 11) = 2.388, P = 0.0822    |
| 3D | 6 mCherry<br>7 hM4  | Mixed-effects model (REML)<br>Factor 1: time (post CNO)<br>Factor 2: viral expression (mcherry, hM4)                                    | time: F (64, 282) = 3.046, P < 0.0001<br>viral expression: F (1, 11) = 3.066, P = 0.1078<br>interaction: F (64, 282) = 1.007, P = 0.4695                                                |
| 3E | 6 mCherry<br>7 hM4  | RM two-way ANOVA<br>Factor 1: treatment (vehicle, CNO)<br>Factor 2: viral expression (mcherry, hM4)<br>Sidak's multiple comparison test | treatment: F (1, 11) = 8.574, P = 0.0137<br>viral expression: F (1, 11) = 0.1502, P = 0.7058<br>interaction: F (1, 11) = 16.66, P = 0.0018<br>subject: F (11, 11) = 7.934, P = 0.0009   |
| 3F | 6 mCherry<br>7 hM4  | Mixed-effects model (REML)<br>Factor 1: time (post CNO)<br>Factor 2: viral expression (mcherry, hM4)                                    | time: F (60, 266) = 2.602, P < 0.0001<br>viral expression: F (1, 11) = 39.28, P < 0.0001<br>interaction: F (60, 266) = 2.202, P < 0.0001                                                |
| 3G | 6 mCherry<br>7 hM4  | RM two-way ANOVA<br>Factor 1: treatment (vehicle, CNO)<br>Factor 2: viral expression (mcherry, hM4)<br>Sidak's multiple comparison test | treatment: F (1, 11) = 76.99, P < 0.0001<br>viral expression: F (1, 11) = 8.633, P = 0.0135<br>interaction: F (1, 11) = 29.00, P = 0.0002<br>subject: F (11, 11) = 3.15, P = 0.0403     |
| 4J | 5 mCherry<br>6 hM3  | RM two-way ANOVA<br>Factor 1: treatment (vehicle, CNO)<br>Factor 2: viral expression (mcherry, hM3)<br>Sidak's multiple comparison test | treatment: F (1, 9) = 0.008375, P = 0.9291<br>viral expression: F (1, 9) = 29.24, P = 0.0004<br>interaction: F (1, 19) = 39.34, P = 0.0001<br>subject: F (9, 9) = 2.126, P = 0.1383     |
| 4K | 5 mCherry<br>5 hM3  | unpaired t test (two-tailed)                                                                                                            | P < 0.0001                                                                                                                                                                              |
| 4L | 5 mCherry<br>6 hM3  | RM two-way ANOVA<br>Factor 1: time (post CNO)<br>Factor 2: viral expression (mcherry, hM3)                                              | time: F (3.565, 32.08) = 4.980, P = 0.0041<br>viral expression: F (1, 9) = 4.695, P = 0.0584<br>interaction: F (12, 108) = 2.566, P = 0.0050<br>subject: F (9, 108) = 18.80, P < 0.0001 |
| 4M | 5 mCherry<br>6 hM3  | RM two-way ANOVA<br>Factor 1: treatment (vehicle, CNO)<br>Factor 2: viral expression (mcherry, hM3)<br>Sidak's multiple comparison test | treatment: F (1, 9) = 7.220, P = 0.0249<br>viral expression: F (1, 9) = 1.227, P = 0.2967<br>interaction: F (1, 9) = 10.55, P = 0.0100<br>subject: F (9, 9) = 4.916, P = 0.0133         |
| 4N | 5 mCherry           | RM two-way ANOVA                                                                                                                        | time: F (2.547, 22.92) = 2.704, P = 0.0769                                                                                                                                              |

|    |                     |                                                                                                                                         |                                                                                                                                                                                                     |
|----|---------------------|-----------------------------------------------------------------------------------------------------------------------------------------|-----------------------------------------------------------------------------------------------------------------------------------------------------------------------------------------------------|
|    | 6 hM3               | Factor 1: time (post CNO)<br>Factor 2: viral expression (mcherry, hM3)                                                                  | viral expression: F (1, 9) = 0.2985, P = 0.5981<br>interaction: F (12, 108) = 0.3523, P = 0.9766<br>subject: F (9, 108) = 13.05, P < 0.0001                                                         |
| 4O | 5 mCherry<br>6 hM3  | RM two-way ANOVA<br>Factor 1: treatment (vehicle, CNO)<br>Factor 2: viral expression (mcherry, hM3)<br>Sidak's multiple comparison test | treatment: F (1, 9) = 0.3504, P = 0.5685<br>viral expression: F (1, 9) = 0.03257, P = 0.8608<br>interaction: F (1, 9) = 2.870, P = 0.1245<br>subject: F (9, 9) = 2.476, P = 0.0965                  |
| 4P | 5 mCherry<br>6 hM3  | RM two-way ANOVA<br>Factor 1: time<br>Factor 2: treatment/viral expression<br>Sidak's multiple comparison test                          | time: F (2.319, 41.74) = 966.6, P < 0.0001<br>treatment/viral expression: F (3, 18) = 0.6880, P = 0.5711<br>interaction: F (12, 72) = 0.8902, P = 0.5606<br>subject: F (18, 72) = 5.658, P < 0.0001 |
| 5D | 5 mCherry<br>6 hM3  | RM two-way ANOVA<br>Factor 1: treatment (vehicle, CNO)<br>Factor 2: viral expression (mcherry, hM3)<br>Sidak's multiple comparison test | treatment: F (1, 17) = 2.219, P = 0.1547<br>viral expression: F (1, 17) = 3.178, P = 0.0925<br>interaction: F (1, 17) = 6.715, P = 0.0190<br>subject: F (17, 17) = 8.078, P < 0.0001                |
| 5E | 5 mCherry<br>6 hM3  | Mixed-effects model (REML)<br>Factor 1: time (post CNO)<br>Factor 2: viral expression (mcherry, hM3)                                    | time: F (40, 275) = 8.738, P < 0.0001<br>viral expression: F (1, 17) = 0.4561, P = 0.5085<br>interaction: F (40, 275) = 2.847, P < 0.0001                                                           |
| 5F | 10 mCherry<br>9 hM3 | RM two-way ANOVA<br>Factor 1: treatment (vehicle, CNO)<br>Factor 2: viral expression (mcherry, hM3)<br>Sidak's multiple comparison test | treatment: F (1, 17) = 7.898, P = 0.0120<br>viral expression: F (1, 17) = 1.252, P = 0.2787<br>interaction: F (1, 17) = 3.971, P = 0.0626<br>subject: F (17, 17) = 12.56, P < 0.0001                |
| 5G | 10 mCherry<br>9 hM3 | Mixed-effects model (REML)<br>Factor 1: time (post CNO)<br>Factor 2: viral expression (mcherry, hM3)                                    | time: F (38, 253) = 2.475, P < 0.0001<br>viral expression: F (1, 17) = 5.311, P = 0.0341<br>interaction: F (38, 253) = 1.627, P < 0.0156                                                            |
| 5H | 10 mCherry<br>9 hM3 | RM two-way ANOVA<br>Factor 1: treatment (vehicle, CNO)<br>Factor 2: viral expression (mcherry, hM3)<br>Sidak's multiple comparison test | treatment: F (1, 17) = 0.002755, P = 0.9588<br>viral expression: F (1, 17) = 1.614, P = 0.2211<br>interaction: F (1, 17) = 17.49, P = 0.0006<br>subject: F (17, 17) = 9.047, P < 0.0001             |
| 5I | 10 mCherry<br>9 hM3 | RM two-way ANOVA<br>Factor 1: time<br>Factor 2: treatment/viral expression<br>Sidak's multiple comparison test                          | time: F (1.153, 39.19) = 215.6, P < 0.0001<br>treatment/viral expression: F (3, 34) = 7.027, P = 0.0008<br>interaction: F (12, 136) = 5.185, P < 0.0001<br>subject: F (34, 136) = 7.339, P < 0.0001 |
| 5M | 3 mCherry<br>5 hM3  | RM two-way ANOVA<br>Factor 1: treatment (vehicle, CNO)<br>Factor 2: viral expression (mcherry, hM3)<br>Sidak's multiple comparison test | treatment: F (1, 6) = 1.756, P = 0.2334<br>viral expression: F (1, 6) = 5.031, P = 0.0661<br>interaction: F (1, 6) = 1.004, P = 0.3551<br>subject: F (6, 6) = 1.362, P = 0.3585                     |
| 5N | 3 mCherry<br>5 hM3  | RM two-way ANOVA<br>Factor 1: time (post CNO)<br>Factor 2: viral expression (mcherry, hM3)                                              | time: F (4.734, 28.41) = 6.860, P = 0.0003<br>viral expression: F (1, 6) = 3.557, P = 0.1083<br>interaction: F (28, 168) = 2.271, P = 0.0007<br>subject: F (6, 168) = 4.619, P = 0.0002             |



|     |                    |                                                                                                                                         |                                                                                                                                                                                                   |
|-----|--------------------|-----------------------------------------------------------------------------------------------------------------------------------------|---------------------------------------------------------------------------------------------------------------------------------------------------------------------------------------------------|
| 5O  | 3 mCherry<br>5 hM3 | RM two-way ANOVA<br>Factor 1: treatment (vehicle, CNO)<br>Factor 2: viral expression (mcherry, hM3)<br>Sidak's multiple comparison test | treatment: F (1, 6) = 0.03281, P = 0.8622<br>viral expression: F (1, 6) = 1.475, P = 0.2701<br>interaction: F (1, 6) = 0.1649, P = 0.6988<br>subject: F (6, 6) = 1.921, P = 0.2234                |
| 5P  | 3 mCherry<br>5 hM3 | RM two-way ANOVA<br>Factor 1: time (post CNO)<br>Factor 2: viral expression (mcherry, hM3)                                              | time: F (2.916, 17.50) = 1.330, P = 0.2965<br>viral expression: F (1, 6) = 2.985, P = 0.1348<br>interaction: F (27, 162) = 3.425, P < 0.0001<br>subject: F (6, 132) = 20.42, P < 0.0001           |
| 5Q  | 3 mCherry<br>5 hM3 | RM two-way ANOVA<br>Factor 1: treatment (vehicle, CNO)<br>Factor 2: viral expression (mcherry, hM3)<br>Sidak's multiple comparison test | treatment: F (1, 6) = 0.2211, P = 0.6548<br>viral expression: F (1, 6) = 0.2390, P = 0.6423<br>interaction: F (1, 6) = 9.596, P = 0.0212<br>subject: F (6, 6) = 4.742, P = 0.0400                 |
| 5R  | 3 mCherry<br>5 hM3 | RM two-way ANOVA<br>Factor 1: time<br>Factor 2: treatment/viral expression<br>Sidak's multiple comparison test                          | time: F (2.906, 34.87) = 405.5, P < 0.0001<br>treatment/viral expression: F (3, 12) = 28.53, P < 0.0001<br>interaction: F (12, 48) = 13.07, P < 0.0001<br>subject: F (6, 132) = 20.42, P < 0.0001 |
| S1B | 5 mCherry<br>5 hM3 | unpaired t test (two-tailed)                                                                                                            | P = 0.0022                                                                                                                                                                                        |
| S1C | 5 mCherry<br>5 hM3 | unpaired t test (two-tailed)                                                                                                            | P = 0.0170                                                                                                                                                                                        |
| S1D | 5 mCherry<br>6 hM3 | RM two-way ANOVA<br>Factor 1: treatment (vehicle, CNO)<br>Factor 2: viral expression (mcherry, hM3)<br>Sidak's multiple comparison test | treatment: F (1, 9) = 2.099, P = 0.1813<br>viral expression: F (1, 9) = 0.2308, P = 0.6424<br>interaction: F (12, 48) = 5.758, P < 0.0001<br>subject: F (9, 9) = 1.462, P = 0.2902                |
| S3A | 5 mCherry<br>6 hM3 | RM two-way ANOVA<br>Factor 1: time (post CNO)<br>Factor 2: viral expression (mcherry, hM3)                                              | time: F (4.061, 36.55) = 5.784, P = 0.0010<br>viral expression: F (1, 9) = 0.06638, P = 0.8025<br>interaction: F (12, 108) = 0.3768, P = 0.9692<br>subject: F (9, 108) = 2.455, P = 0.0139        |
| S3B | 5 mCherry<br>6 hM3 | RM two-way ANOVA<br>Factor 1: treatment (vehicle, CNO)<br>Factor 2: viral expression (mcherry, hM3)<br>Sidak's multiple comparison test | treatment: F (1, 9) = 1.859, P = 0.2059<br>viral expression: F (1, 9) = 0.4086, P = 0.5386<br>interaction: F (1, 9) = 0.003788, P = 0.9523<br>subject: F (9, 9) = 0.8222, P = 0.6123              |
| S3C | 8 mCherry<br>9 hM3 | Mixed-effects model (REML)<br>Factor 1: time (post CNO)<br>Factor 2: viral expression (mcherry, hM3)                                    | time: F (38, 225) = 5.370, P < 0.0001<br>viral expression: F (1, 15) = 1.478, P = 0.2429<br>interaction: F (38, 225) = 2.233, P = 0.0002                                                          |
| S3D | 8 mCherry<br>9 hM3 | RM two-way ANOVA<br>Factor 1: treatment (vehicle, CNO)<br>Factor 2: viral expression (mcherry, hM3)<br>Sidak's multiple comparison test | treatment: F (1, 15) = 6.964, P = 0.0186<br>viral expression: F (1, 15) = 2.111, P = 0.1669<br>interaction: F (1, 15) = 0.1738, P = 0.6827<br>subject: F (15, 15) = 5.994, P = 0.0006             |
| S3E | 3 mCherry          | RM two-way ANOVA                                                                                                                        | time: F (4.949, 29.69) = 6.543, P = 0.0003                                                                                                                                                        |

|     |                    |                                                                                                                                         |                                                                                                                                                                                          |
|-----|--------------------|-----------------------------------------------------------------------------------------------------------------------------------------|------------------------------------------------------------------------------------------------------------------------------------------------------------------------------------------|
|     | 5 hM3              | Factor 1: time (post CNO)<br>Factor 2: viral expression (mcherry, hM3)                                                                  | viral expression: $F(1, 6) = 2.533, P = 0.1626$<br>interaction: $F(27, 162) = 1.874, P = 0.0091$<br>subject: $F(6, 162) = 4.966, P < 0.0001$                                             |
| S3F | 3 mCherry<br>5 hM3 | RM two-way ANOVA<br>Factor 1: treatment (vehicle, CNO)<br>Factor 2: viral expression (mcherry, hM3)<br>Sidak's multiple comparison test | treatment: $F(1, 6) = 0.0007374, P = 0.9792$<br>viral expression: $F(1, 6) = 3.189, P = 0.1244$<br>interaction: $F(1, 6) = 1.213, P = 0.3129$<br>subject: $F(6, 6) = 0.2720, P = 0.9309$ |
